# Supplementary material for: Different Non-Structural Carbohydrates/Crude Proteins (NCS/CP) Ratios in Diet Shape the Gastrointestinal Microbiota of Water Buffalo
Source: MDPI journal article supplement (doi:10.3390/vetsci8060096), 2021-05-31

**Supplementary Figure S1\_Family core.** Core microbiota at Family level of rumen, large intestine and feces from differentially fed water buffaloes. Families shared by at least 80% of samples included in each body site: (A) traditionally fed water buffaloes; (B) alternatively fed water buffaloes.

A Families included in the core microbiota in traditionally fed water buffaloes.

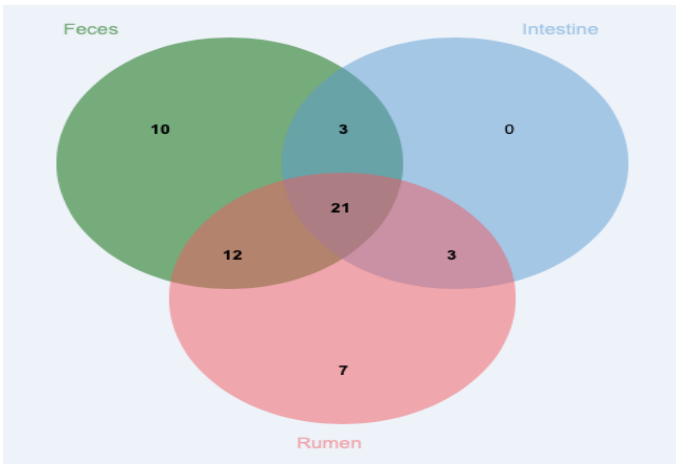

B Families included in the core microbiota in alternatively fed water buffaloes.

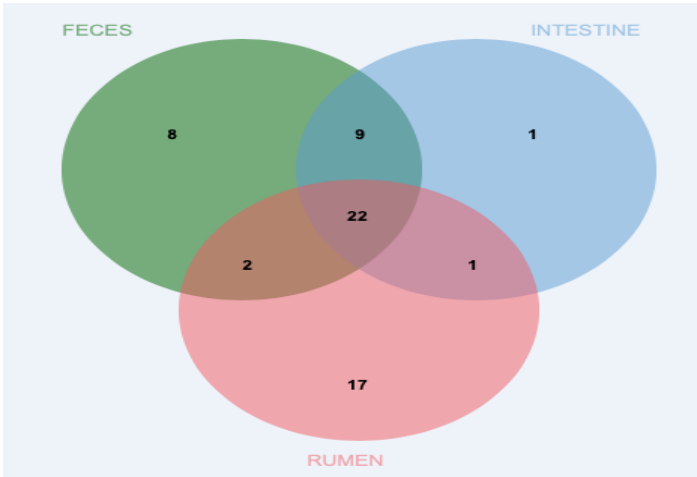

Supplement: s1 [file s1]
