# Supplementary material for: Different Non-Structural Carbohydrates/Crude Proteins (NCS/CP) Ratios in Diet Shape the Gastrointestinal Microbiota of Water Buffalo
Source: Vet Sci. 2021 May 31;8(6):96. doi: 10.3390/vetsci8060096 (PMC8229247; doi:10.3390/vetsci8060096)
Supplement: Supplementary file 1 [file vetsci-08-00096-s001.zip]

Archive with 4 entries (4 files):
- Suppl_Fig 1_Family Core.pdf
- Suppl_Table_1_negative controls.xlsx
- Suppl_Table_2_Core_Families_Genera_rv.xlsx
- Suppl_Table_3_ANCOM results.xlsx
