# Supplementary material for: Different Non-Structural Carbohydrates/Crude Proteins (NCS/CP) Ratios in Diet Shape the Gastrointestinal Microbiota of Water Buffalo
Source: Vet Sci. 2021 May 31;8(6):96. doi: 10.3390/vetsci8060096 (PMC8229247; doi:10.3390/vetsci8060096)
Supplement: Supplementary file 1 [file vetsci-08-00096-s001.zip › Suppl_Table_1_negative controls.xlsx]

## Sheet: Foglio 1
Supplementary Table 1. Features present in the negative controls included in the study
Feature ID	Frequency	Frequency in study samples	Number of samples	Taxonomy
659ec5e4f00d77eaeb6e5497cf9748b3	5.413	11	1	Cupriavidus sp. strain
c2d42ef174a92f22c56afb17890937c3	3.297	Not detected	0
abaa56340e3a24d35d652f02bf52373a	2.617	Not detected	0
b6cdc70aa45d40932d3e84de54a213aa	1.964	Not detected	0
a43060499090e1ab539350169ee8b6d6	658	1.138	9	Uncultured bacterium
770e6b4324532a6056cacb5f017f1514	650	Not detected	0
622d4b855598fb2a7f2ff579ec8e6d53	573	Not detected	0
8c351dafca7d172bcc2891e12aa44a8c	568	Not detected	0
0e9948ee851acfbfca0dc1c1cba39abe	535	1.442	7	Uncultured rumen bacterium
7fa93e66b72549b470447bd88e0f4464	471	Not detected	0
bdf942792a816d22ee603278fed9fcda	417	Not detected	0
1ae2221d44299f11b92ec252bf684fae	376	Not detected	0
355e0be8f4bc1d4ffd968a929bb3f5d4	296	Not detected	0
8b01c247324ac3322f90fab269757692	254	8.305	4	Shewanella spp
734b4211675b664fed821116cd7aba6c	238	Not detected	0
fef89b3813d98792cad3300a4f231ec2	211	Not detected	0
7da303b62ca8fed64f4270373b637d50	210	Not detected	0
a1561262ed51e531cbf793e2d1e26853	205	5.185	11	Uncultured bacterium
943fe82ca536df38d4b3bf4ecab1a5ec	203	445	6	Uncultured bacterium
a8f1a5fc0fa3d80d449aab1157285bc3	193	Not detected	0
e8bfba4a41f9f5b7b9f83697d7decf2d	162	5.842	6	Shewanella spp
